# Supplementary material for: TDP2 suppresses genomic instability induced by androgens in the epithelial cells of prostate glands
Source: PubMed Central journal article supplement (PMC7497232; doi:10.1111/gtc.12770), 2020-05-05

**(a)** LNCaP

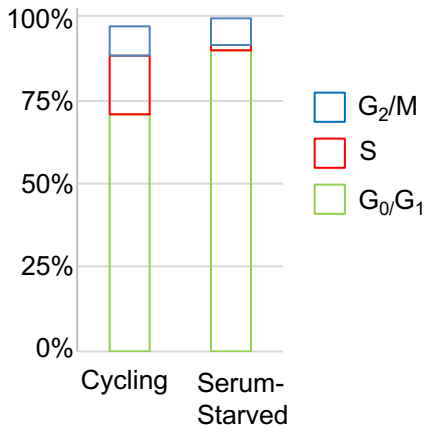

**(b)** LNCaP

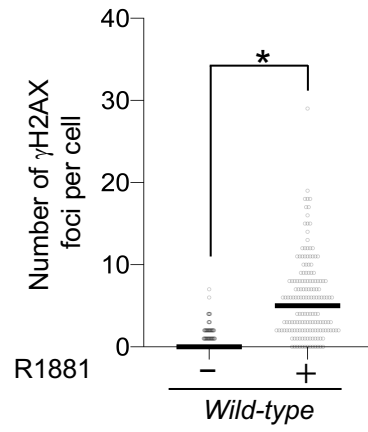

**(c)** LNCaP

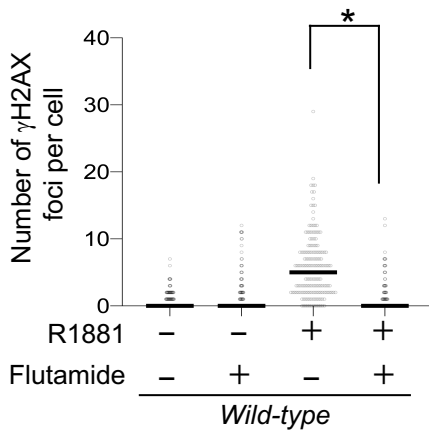

**(d)** LNCaP

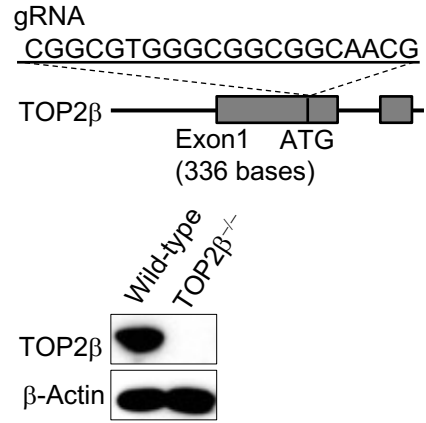

**(e)** LNCaP

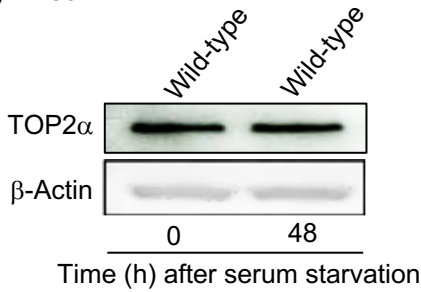

**(f)** LNCaP

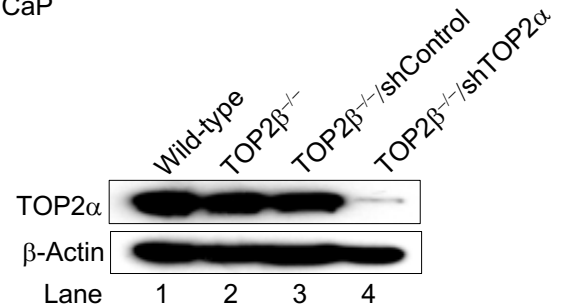

**(g)** LNCaP

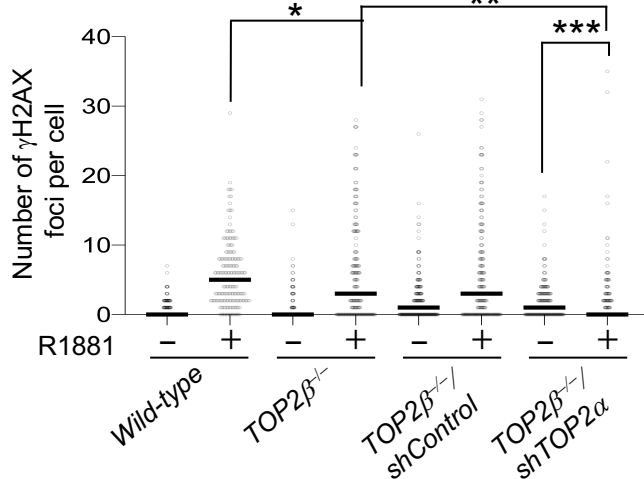

(a) LNCaP

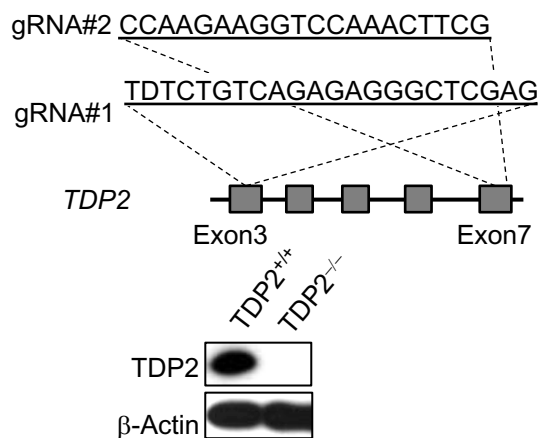

(c) LNCaP

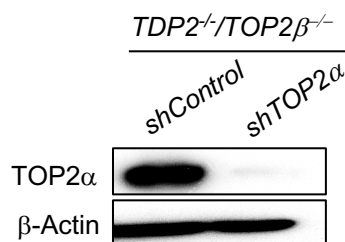

(b) LNCaP

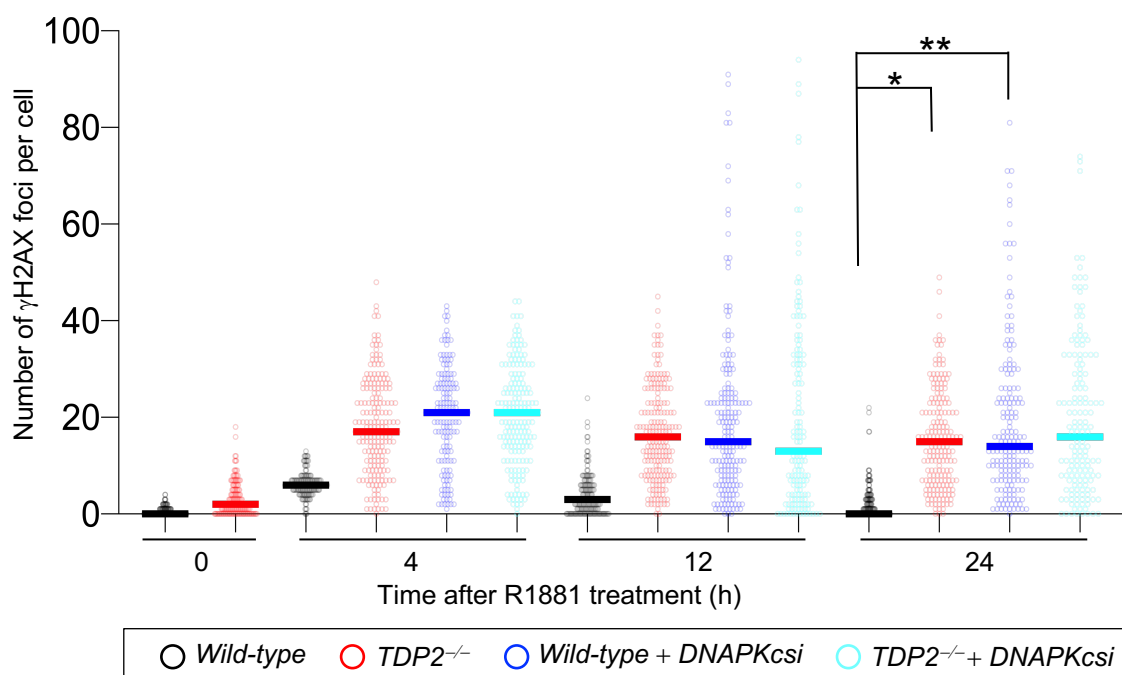



**(a)** Prostate gland, 2-month-old

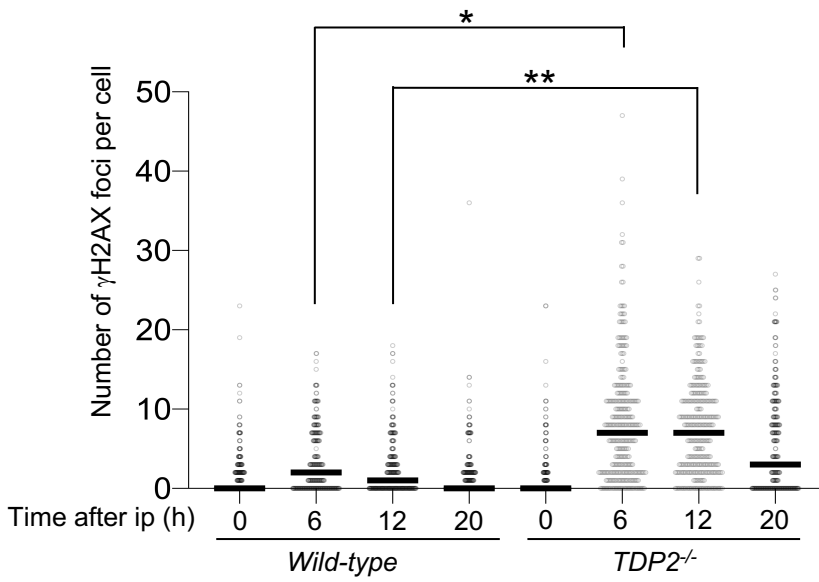

**(b)** Spleen, 2-month-old

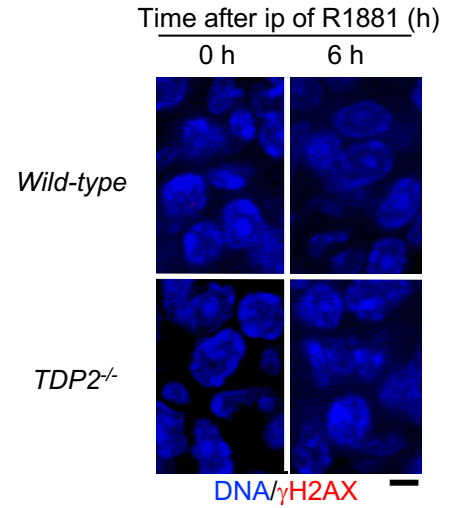

**(c)** Spleen, 2-month-old

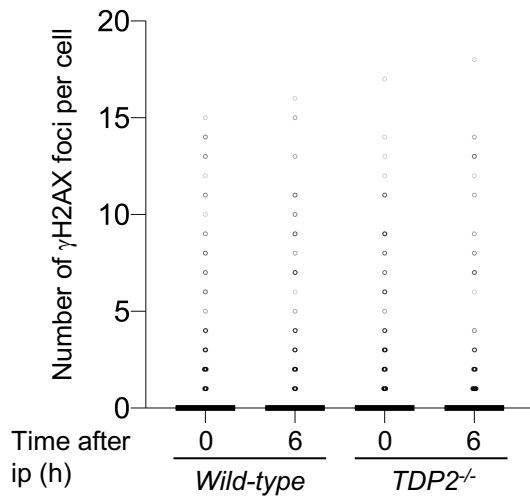

**(d)** Mammary gland, 2-month-old

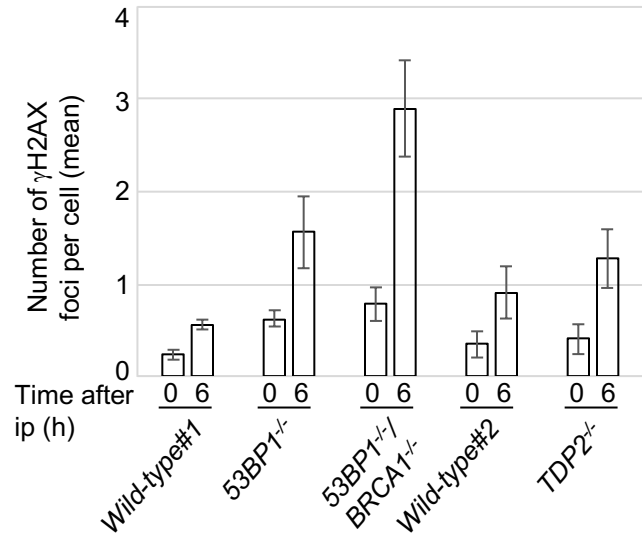

**(a)** Intestine and Spleen, 2-month-old

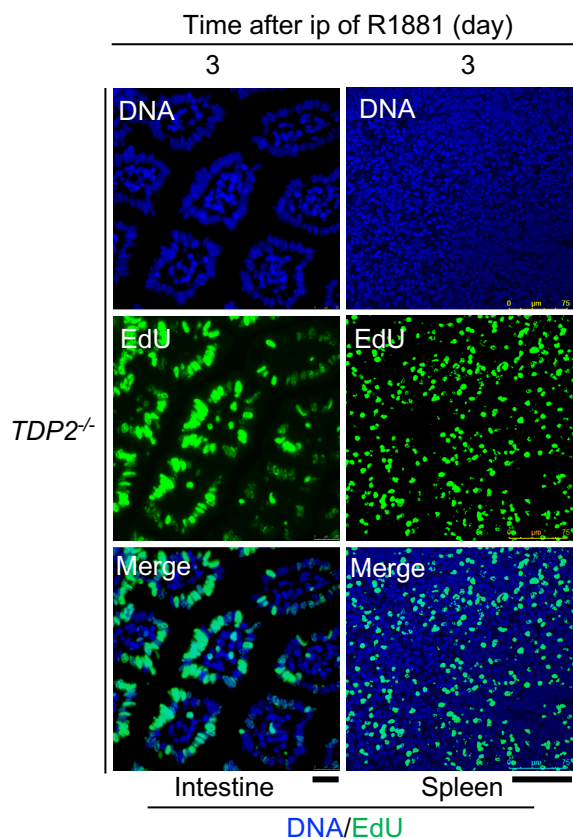

**(b)** Prostate gland, 2-month-old

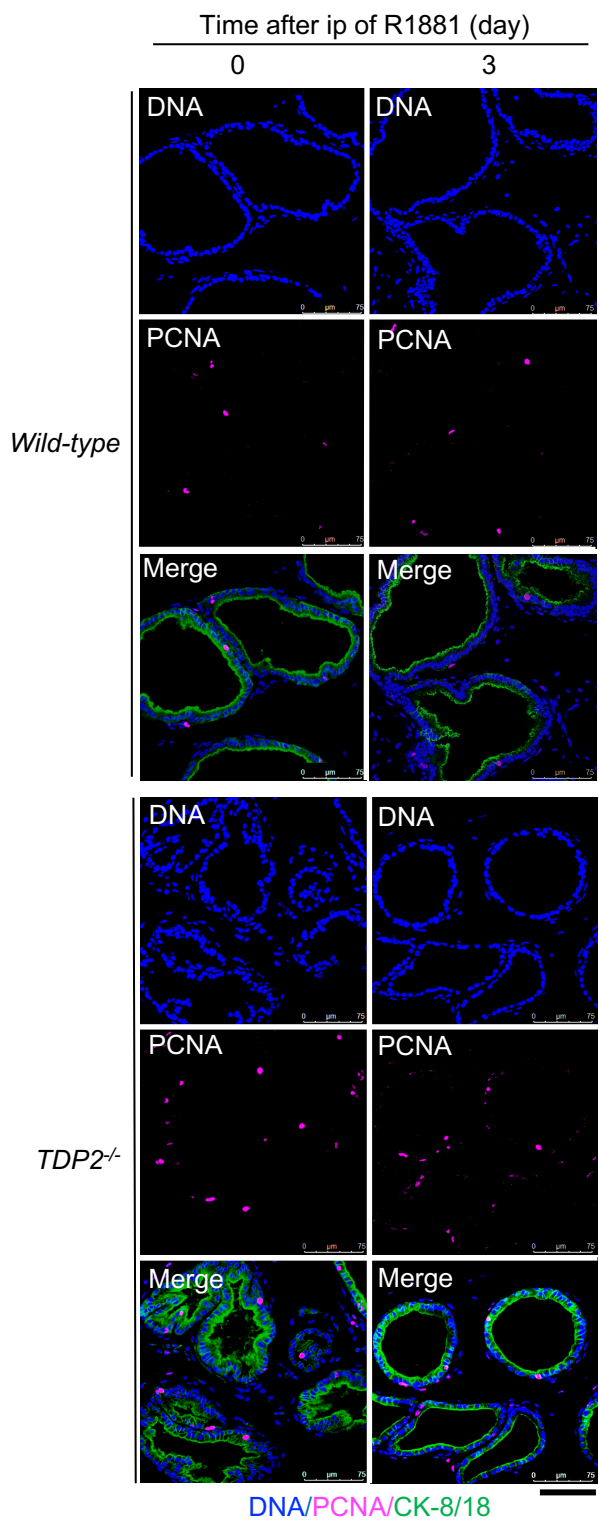

Supplement: GTC-25-450-s001.pdf [file GTC-25-450-s001.pdf]
