# Supplementary material for: TDP2 suppresses genomic instability induced by androgens in the epithelial cells of prostate glands
Source: PubMed Central journal article supplement (PMC7497232; doi:10.1111/gtc.12770), 2020-05-05
Supplement: GTC-25-450-s002.pdf [file GTC-25-450-s002.pdf]

## SUPPLEMENTAL TABLES

**TABLE S1, List of Resources**

| Reagent or Resource                                      | Source                               | Identifier                     |
|----------------------------------------------------------|--------------------------------------|--------------------------------|
| <b>Antibodies</b>                                        |                                      |                                |
| Rat monoclonal $\alpha$ -Cytokeratin-8/18                | Developmental Studies Hybridoma Bank | Cat# TROMA-I, RRID:AB_531826   |
| Goat polyclonal $\alpha$ -rabbit AlexaFluor 546          | ThermoFisher                         | Cat# 11035, RRID: AB_2534093   |
| Goat polyclonal $\alpha$ -rat AlexaFluor 488             | Cell Signaling Technology            | Cat# 4416S, RRID: AB_10693769  |
| Mouse monoclonal $\alpha$ - $\gamma$ H2AX (clone JBW301) | Millipore                            | Cat# 05-636, RRID: AB_309864   |
| Rabbit monoclonal $\alpha$ - $\gamma$ H2AX               | Cell Signaling Technology            | Cat# 9718, RRID: AB_2118009    |
| Rabbit polyclonal $\alpha$ -CyclinA (clone C19)          | Santa Cruz                           | Cat# sc-596, RRID: AB_631330   |
| Mouse monoclonal $\alpha$ -Top2 $\alpha$                 | Novusbio                             | Cat# NBP2-47643                |
| Mouse monoclonal $\alpha$ -Top2 $\beta$                  | (Tsutsui et al., 2001)               | N/A                            |
| Mouse monoclonal $\alpha$ - $\beta$ -actin               | Sigma                                | Cat# A5411                     |
| Goat polyclonal $\alpha$ -mouse AlexaFluor 488           | ThermoFisher                         | Cat# A-11029, RRID: AB_2534088 |
| Goat polyclonal $\alpha$ -rabbit AlexaFluor 488          | ThermoFisher                         | Cat# A11034, RRID: AB_2576217  |
| Goat polyclonal $\alpha$ -rabbit AlexaFluor 594          | ThermoFisher                         | Cat# A11037, RRID: AB_2534095  |
| Donkey polyclonal $\alpha$ -mouse HRP                    | Santa Cruz                           | Cat# sc-2314, RRID: AB_641170  |

| <b>Chemicals, Peptides, and Recombinant Proteins</b>                |                      |                |
|---------------------------------------------------------------------|----------------------|----------------|
| Charcoal/Dextran treated FBS                                        | Hyclone Laboratories | Cat#SH30068.03 |
| Giemsa's Stain Solution                                             | Nacalai Tesque       | Cat# 377114-35 |
| Albumin, Bovine, F-V, pH5.2                                         | Nacalai Tesque       | Cat# 01863-48  |
| Skim Milk for immunoassay                                           | Nacalai Tesque       | Cat# 31149-75  |
| R1881                                                               | Sigma                | Cat# R0908     |
| Flutamide                                                           | Wako                 | Cat# 069-04851 |
| NU7441(KU-57788)                                                    | Selleck              | Cat# S2638     |
| 17 $\beta$ -Estradiol solution                                      | Sigma                | Cat# E-060     |
| Hoechst 33258                                                       | Nacalai Tesque       | Cat # 04928-92 |
| Paraformaldehyde                                                    | Wako                 | Cat# 16320145  |
| Lipofectamine 3000 Transfection Kit                                 | ThermoFischer        | Cat# L3000008  |
| FuGENE HD Transfection Reagent                                      | Promega              | Cat# E2312     |
| Doxycycline Hydrochloride                                           | MP Biomedicals, Inc. | Cat# 195044    |
| Fluoro-KEEPER Antifade Reagent                                      | Nacalai Tesque       | Cat# 12745-74  |
| 2.5 g/l-Trypsin/1 mmol/l-EDTA Solution                              | Nacalai Tesque       | Cat# 35554-64  |
| Propidium iodine (PI)                                               | DOJINDO              | Cat# P378      |
| <b>Critical Commercial Assays</b>                                   |                      |                |
| GeneArt Seamless Cloning Enzyme Mix                                 | ThermoFisher         | Cat# A14606    |
| Click-iT <sup>®</sup> EdU Alexa Fluor <sup>®</sup> 488 Imaging Kits | Invitrogen           | Cat# C10337    |
| <b>Experimental Models: Cell Lines</b>                              |                      |                |
| Human: LNCaP, <i>wild-type</i>                                      | ATCC                 | Cat# CRL-1740  |
| Human: Lenti-X <sup>™</sup> 293T                                    | TAKARA               | Cat# 632180    |
| <b>Experimental Models: Organisms/Strains</b>                       |                      |                |

|                                                      |                    |            |
|------------------------------------------------------|--------------------|------------|
| The mutant genotypes of LNCaP are listed in Table S2 | This work          |            |
| <b>Oligonucleotides</b>                              |                    |            |
| The primers are listed in Table S3                   | This work          |            |
| Mice: C57BL/6J                                       |                    | N/A        |
| Mice: C57BL/6J <i>TDP2</i> <sup>-/-</sup>            |                    | N/A        |
| <b>Recombinant DNA</b>                               |                    |            |
| Plasmid: pSpCas9(BB)-2A-Puro(pX459)                  | (Ran, 2013)        | Cat# 48139 |
| Plasmid: pLKO.1                                      | (Hoa et al., 2016) | Cat#8453   |

**TABLE S2, List of Mutant Genotypes used in this study**

| Genotype                                                    | Name of cell line and species | Treatment <sup>a</sup> | Marker genes | Source     | Identifier |
|-------------------------------------------------------------|-------------------------------|------------------------|--------------|------------|------------|
| <i>TDP2</i> <sup>-/-</sup>                                  | Human LNCaP                   |                        |              | This study | N/A        |
| <i>TOP2β</i> <sup>-/-</sup>                                 | Human LNCaP                   |                        |              |            |            |
| <i>TOP2β</i> <sup>-/-</sup> /<br><i>TDP2</i> <sup>-/-</sup> | Human LNCaP                   |                        |              |            |            |

**TABLE S3 List of oligonucleotides used in this study**

| Reagent or resource                                                            | Source  | Identifier |
|--------------------------------------------------------------------------------|---------|------------|
| Oligonucleotides (gRNA sequence)                                               |         |            |
| LNCaP, <i>TDP2</i> , gRNA#1 (for gene disruption), 5'-TCTGTCAGAGAGGGCTCGAG -3' | Eurofin | N/A        |
| LNCaP, <i>TDP2</i> , gRNA#2 (for gene disruption), 5'-CGAAGTTTGGACCTTCTTGG -3' | Eurofin | N/A        |
| LNCaP, <i>TOP2β</i> , gRNA (for gene disruption), 5'-CGGCGTGGGCGGCGCAACG -3'   | Eurofin | N/A        |
| Oligonucleotides (shRNA sequences for pLKO.1 vector)                           |         |            |

|                                                                                                        |         |     |
|--------------------------------------------------------------------------------------------------------|---------|-----|
| <i>TOP2α</i> , forward primer, 5'-<br>CCGGCCATTGTAAAGGTATCTAAACTCGAGTTTAG<br>ATACCTTTACAATGGGTTTTT -3' | Eurofin | N/A |
| <i>TOP2α</i> , reverse primer, 5'-<br>AATTAAAACCCATTGTAAAGGTATCTAAACTCGA<br>GTTTAGATACCTTTACAATGGG -3' | Eurofin | N/A |

**TABLE S4 Actual number of cells counted in each experiment**

| <b>Figure 1</b> |                                          |                   |                               |
|-----------------|------------------------------------------|-------------------|-------------------------------|
| <b>Figure</b>   | <b>Genotype/ Condition</b>               | <b>Experiment</b> | <b>Number of cell counted</b> |
| 1c              | <i>Wild-type</i> R1881 (-)               | Exp. 01           | 73                            |
|                 |                                          | Exp. 02           | 67                            |
|                 |                                          | Exp. 03           | 59                            |
|                 | <i>Wild-type</i> R1881 (+)               | Exp. 01           | 51                            |
|                 |                                          | Exp. 02           | 68                            |
|                 |                                          | Exp. 03           | 51                            |
| 1e              | <i>Wild-type</i> R1881 (-) Flutamide (-) | Exp. 01           | 73                            |
|                 |                                          | Exp. 02           | 67                            |
|                 |                                          | Exp. 03           | 59                            |
|                 | <i>Wild-type</i> R1881 (-) Flutamide (+) | Exp. 01           | 66                            |
|                 |                                          | Exp. 02           | 62                            |
|                 |                                          | Exp. 03           | 53                            |
|                 | <i>Wild-type</i> R1881 (+) Flutamide (-) | Exp. 01           | 51                            |
|                 |                                          | Exp. 02           | 68                            |
|                 |                                          | Exp. 03           | 51                            |
|                 | <i>Wild-type</i> R1881 (+) Flutamide (+) | Exp. 01           | 55                            |
|                 |                                          | Exp. 02           | 77                            |
|                 |                                          | Exp. 03           | 51                            |
| 1g              | <i>Wild-type</i> R1881 (-)               | Exp. 01           | 73                            |
|                 |                                          | Exp. 02           | 67                            |
|                 |                                          | Exp. 03           | 59                            |
|                 | <i>Wild-type</i> R1881 (+)               | Exp. 01           | 51                            |
|                 |                                          | Exp. 02           | 68                            |
|                 |                                          | Exp. 03           | 51                            |
|                 | <i>TOP2β</i> <sup>-/-</sup> R1881 (-)    | Exp. 01           | 58                            |
|                 |                                          | Exp. 02           | 61                            |
|                 |                                          | Exp. 03           | 74                            |
|                 | <i>TOP2β</i> <sup>-/-</sup> R1881 (+)    | Exp. 01           | 72                            |

|                                 |                                                                 | Exp. 02           | 78                            |
|---------------------------------|-----------------------------------------------------------------|-------------------|-------------------------------|
|                                 |                                                                 | Exp. 03           | 54                            |
|                                 | <i>TOP2β</i> <sup>-/-</sup> / <i>shControl</i> <i>R1881</i> (-) | Exp. 01           | 74                            |
|                                 |                                                                 | Exp. 02           | 74                            |
|                                 |                                                                 | Exp. 03           | 72                            |
|                                 | <i>TOP2β</i> <sup>-/-</sup> / <i>shControl</i> <i>R1881</i> (+) | Exp. 01           | 62                            |
|                                 |                                                                 | Exp. 02           | 71                            |
|                                 |                                                                 | Exp. 03           | 68                            |
|                                 | <i>TOP2β</i> <sup>-/-</sup> / <i>shTop2α</i> <i>R1881</i> (+)   | Exp. 01           | 65                            |
|                                 |                                                                 | Exp. 02           | 61                            |
|                                 |                                                                 | Exp. 03           | 59                            |
|                                 | <i>TOP2β</i> <sup>-/-</sup> / <i>shTop2α</i> <i>R1881</i> (+)   | Exp. 01           | 53                            |
|                                 |                                                                 | Exp. 02           | 52                            |
|                                 |                                                                 | Exp. 03           | 57                            |
| <b>Figure 2</b>                 |                                                                 |                   |                               |
| <b>Figure</b>                   | <b>Genotype/ Condition/ Time</b>                                | <b>Experiment</b> | <b>Number of cell counted</b> |
| 2c                              | <i>Wild-type</i> 0 h                                            | Exp. 01           | 73                            |
|                                 |                                                                 | Exp. 02           | 67                            |
|                                 |                                                                 | Exp. 03           | 59                            |
|                                 | <i>Wild-type</i> 4 h                                            | Exp. 01           | 51                            |
|                                 |                                                                 | Exp. 02           | 68                            |
|                                 |                                                                 | Exp. 03           | 51                            |
|                                 | <i>Wild-type</i> 12 h                                           | Exp. 01           | 51                            |
|                                 |                                                                 | Exp. 02           | 56                            |
|                                 |                                                                 | Exp. 03           | 76                            |
|                                 | <i>Wild-type</i> 24 h                                           | Exp. 01           | 65                            |
|                                 |                                                                 | Exp. 02           | 79                            |
|                                 |                                                                 | Exp. 03           | 69                            |
|                                 | <i>TDP2</i> <sup>-/-</sup> 0 h                                  | Exp. 01           | 64                            |
|                                 |                                                                 | Exp. 02           | 54                            |
|                                 |                                                                 | Exp. 03           | 60                            |
|                                 | <i>TDP2</i> <sup>-/-</sup> 4 h                                  | Exp. 01           | 69                            |
|                                 |                                                                 | Exp. 02           | 66                            |
|                                 |                                                                 | Exp. 03           | 64                            |
|                                 | <i>TDP2</i> <sup>-/-</sup> 12 h                                 | Exp. 01           | 74                            |
|                                 |                                                                 | Exp. 02           | 79                            |
|                                 |                                                                 | Exp. 03           | 52                            |
| <i>TDP2</i> <sup>-/-</sup> 24 h | Exp. 01                                                         | 71                |                               |

|                                                                                         |                                                                                         |         |    |
|-----------------------------------------------------------------------------------------|-----------------------------------------------------------------------------------------|---------|----|
|                                                                                         |                                                                                         | Exp. 02 | 64 |
|                                                                                         |                                                                                         | Exp. 03 | 61 |
|                                                                                         | <i>Wild-type</i> + DNAPKcsi 4 h                                                         | Exp. 01 | 51 |
|                                                                                         |                                                                                         | Exp. 02 | 54 |
|                                                                                         |                                                                                         | Exp. 03 | 53 |
|                                                                                         | <i>Wild-type</i> + DNAPKcsi 12 h                                                        | Exp. 01 | 65 |
|                                                                                         |                                                                                         | Exp. 02 | 57 |
|                                                                                         |                                                                                         | Exp. 03 | 70 |
|                                                                                         | <i>Wild-type</i> + DNAPKcsi 24 h                                                        | Exp. 01 | 63 |
|                                                                                         |                                                                                         | Exp. 02 | 65 |
|                                                                                         |                                                                                         | Exp. 03 | 56 |
|                                                                                         | <i>TDP2</i> <i>-/-</i> + DNAPKcsi 4 h                                                   | Exp. 01 | 59 |
|                                                                                         |                                                                                         | Exp. 02 | 62 |
|                                                                                         |                                                                                         | Exp. 03 | 69 |
|                                                                                         | <i>TDP2</i> <i>-/-</i> + DNAPKcsi 12 h                                                  | Exp. 01 | 52 |
|                                                                                         |                                                                                         | Exp. 02 | 51 |
|                                                                                         |                                                                                         | Exp. 03 | 51 |
|                                                                                         | <i>TDP2</i> <i>-/-</i> + DNAPKcsi 24 h                                                  | Exp. 01 | 55 |
|                                                                                         |                                                                                         | Exp. 02 | 53 |
|                                                                                         |                                                                                         | Exp. 03 | 53 |
| 2e                                                                                      | <i>TDP2</i> <i>-/-</i> 0 h                                                              | Exp. 01 | 64 |
|                                                                                         |                                                                                         | Exp. 02 | 54 |
|                                                                                         |                                                                                         | Exp. 03 | 60 |
|                                                                                         | <i>TDP2</i> <i>-/-</i> 4 h                                                              | Exp. 01 | 69 |
|                                                                                         |                                                                                         | Exp. 02 | 66 |
|                                                                                         |                                                                                         | Exp. 03 | 64 |
|                                                                                         | <i>TDP2</i> <sup>-/-</sup> / <i>TOP2</i> <sup>β</sup> -/ <i>shControl</i> 0 h           | Exp. 01 | 58 |
|                                                                                         |                                                                                         | Exp. 02 | 55 |
|                                                                                         |                                                                                         | Exp. 03 | 57 |
|                                                                                         | <i>TDP2</i> <sup>-/-</sup> / <i>TOP2</i> <sup>β</sup> -/ <i>shControl</i> 4 h           | Exp. 01 | 52 |
|                                                                                         |                                                                                         | Exp. 02 | 61 |
|                                                                                         |                                                                                         | Exp. 03 | 62 |
|                                                                                         | <i>TDP2</i> <sup>-/-</sup> / <i>TOP2</i> <sup>β</sup> -/ <i>shTOP2</i> <sup>α</sup> 0 h | Exp. 01 | 63 |
|                                                                                         |                                                                                         | Exp. 02 | 62 |
|                                                                                         |                                                                                         | Exp. 03 | 54 |
| <i>TDP2</i> <sup>-/-</sup> / <i>TOP2</i> <sup>β</sup> -/ <i>shTOP2</i> <sup>α</sup> 4 h | Exp. 01                                                                                 | 58      |    |
|                                                                                         | Exp. 02                                                                                 | 61      |    |
|                                                                                         | Exp. 03                                                                                 | 58      |    |
| 2f                                                                                      | <i>Wild-type</i> R1881 (-)                                                              | Exp. 01 | 50 |

|  |                                      |         |    |
|--|--------------------------------------|---------|----|
|  |                                      | Exp. 02 | 50 |
|  |                                      | Exp. 03 | 50 |
|  | <i>Wild-type</i> R1881 (+)           | Exp. 01 | 50 |
|  |                                      | Exp. 02 | 50 |
|  |                                      | Exp. 03 | 50 |
|  | <i>TDP2</i> <sup>-/-</sup> R1881 (-) | Exp. 01 | 50 |
|  |                                      | Exp. 02 | 50 |
|  |                                      | Exp. 03 | 50 |
|  | <i>TDP2</i> <sup>-/-</sup> R1881 (+) | Exp. 01 | 50 |
|  |                                      | Exp. 02 | 50 |
|  |                                      | Exp. 03 | 50 |

**Figure 3**

| <b>Figure</b> | <b>Genotype/ Condition/ Time</b> | <b>Experiment</b> | <b>Number of cell counted</b> |
|---------------|----------------------------------|-------------------|-------------------------------|
| 3b            | <i>Wild-type</i> 0 h             | Exp. 01           | 121                           |
|               |                                  | Exp. 02           | 100                           |
|               |                                  | Exp. 03           | 100                           |
|               | <i>Wild-type</i> 6 h             | Exp. 01           | 109                           |
|               |                                  | Exp. 02           | 100                           |
|               |                                  | Exp. 03           | 100                           |
|               | <i>Wild-type</i> 12 h            | Exp. 01           | 100                           |
|               |                                  | Exp. 02           | 100                           |
|               |                                  | Exp. 03           | 100                           |
|               | <i>Wild-type</i> 20 h            | Exp. 01           | 122                           |
|               |                                  | Exp. 02           | 100                           |
|               |                                  | Exp. 03           | 100                           |
|               | <i>TDP2</i> <sup>-/-</sup> 0 h   | Exp. 01           | 101                           |
|               |                                  | Exp. 02           | 100                           |
|               |                                  | Exp. 03           | 100                           |
|               | <i>TDP2</i> <sup>-/-</sup> 6 h   | Exp. 01           | 110                           |
|               |                                  | Exp. 02           | 100                           |
|               |                                  | Exp. 03           | 100                           |
|               | <i>TDP2</i> <sup>-/-</sup> 12 h  | Exp. 01           | 107                           |
|               |                                  | Exp. 02           | 100                           |
|               |                                  | Exp. 03           | 100                           |
|               | <i>TDP2</i> <sup>-/-</sup> 20 h  | Exp. 01           | 103                           |
|               |                                  | Exp. 02           | 100                           |
|               |                                  | Exp. 03           | 100                           |
| 3d            | <i>Wild-type</i> #1 6 h          | Exp. 01           | 151                           |

|                 |                                                               | Exp. 02           | 76                            |
|-----------------|---------------------------------------------------------------|-------------------|-------------------------------|
|                 |                                                               | Exp. 03           | 146                           |
|                 | <i>53BP1</i> -/- 6 h                                          | Exp. 01           | 220                           |
|                 |                                                               | Exp. 02           | 215                           |
|                 |                                                               | Exp. 03           | 217                           |
|                 | <i>53BP1</i> <sup>-/-</sup> / <i>BRCA1</i> <sup>-/-</sup> 6 h | Exp. 01           | 186                           |
|                 |                                                               | Exp. 02           | 297                           |
|                 |                                                               | Exp. 03           | 124                           |
|                 | <i>Wild-type</i> #2 6 h                                       | Exp. 01           | 118                           |
|                 |                                                               | Exp. 02           | 103                           |
|                 |                                                               | Exp. 03           | 164                           |
|                 | <i>TDP2</i> -/- 6 h                                           | Exp. 01           | 130                           |
|                 |                                                               | Exp. 02           | 115                           |
|                 |                                                               | Exp. 03           | 115                           |
| <b>Figure 4</b> |                                                               |                   |                               |
| <b>Figure</b>   | <b>Genotype/ Condition/ Time</b>                              | <b>Experiment</b> | <b>Number of cell counted</b> |
| 4c              | <i>Wild-type</i> day 0                                        | Exp. 01           | 752                           |
|                 |                                                               | Exp. 02           | 714                           |
|                 |                                                               | Exp. 03           | 733                           |
|                 | <i>Wild-type</i> day 3                                        | Exp. 01           | 795                           |
|                 |                                                               | Exp. 02           | 728                           |
|                 |                                                               | Exp. 03           | 768                           |
|                 | <i>TDP2</i> -/- day 0                                         | Exp. 01           | 661                           |
|                 |                                                               | Exp. 02           | 564                           |
|                 |                                                               | Exp. 03           | 705                           |
|                 | <i>TDP2</i> -/- day 3                                         | Exp. 01           | 616                           |
|                 |                                                               | Exp. 02           | 675                           |
|                 |                                                               | Exp. 03           | 882                           |
| 4d              | <i>Wild-type</i> day 0                                        | Exp. 01           | 650                           |
|                 |                                                               | Exp. 02           | 661                           |
|                 |                                                               | Exp. 03           | 880                           |
|                 | <i>Wild-type</i> day 3                                        | Exp. 01           | 710                           |
|                 |                                                               | Exp. 02           | 872                           |
|                 |                                                               | Exp. 03           | 864                           |
|                 | <i>TDP2</i> -/- day 0                                         | Exp. 01           | 576                           |
|                 |                                                               | Exp. 02           | 613                           |
|                 |                                                               | Exp. 03           | 545                           |
|                 | <i>TDP2</i> -/- day 3                                         | Exp. 01           | 751                           |



|                 |                                  | Exp. 02           | 851                           |
|-----------------|----------------------------------|-------------------|-------------------------------|
|                 |                                  | Exp. 03           | 720                           |
| <b>Figure 5</b> |                                  |                   |                               |
| <b>Figure</b>   | <b>Genotype/ Condition/ Time</b> | <b>Experiment</b> | <b>Number of cell counted</b> |
| 5b              | <i>Wild-type</i> 2 m             | Exp. 01           | 650                           |
|                 |                                  | Exp. 02           | 661                           |
|                 |                                  | Exp. 03           | 880                           |
|                 | <i>Wild-type</i> 6 m             | Exp. 01           | 607                           |
|                 |                                  | Exp. 02           | 783                           |
|                 |                                  | Exp. 03           | 682                           |
|                 |                                  | Exp. 04           | 650                           |
|                 |                                  | Exp. 05           | 534                           |
|                 | <i>TDP2 -/-</i> 2 m              | Exp. 01           | 576                           |
|                 |                                  | Exp. 02           | 613                           |
|                 |                                  | Exp. 03           | 545                           |
|                 | <i>TDP2 -/-</i> 6 m              | Exp. 01           | 877                           |
|                 |                                  | Exp. 02           | 653                           |
|                 |                                  | Exp. 03           | 532                           |
|                 |                                  | Exp. 04           | 926                           |
| Exp. 05         |                                  | 755               |                               |
| 5d              | <i>Wild-type</i> 2 m             | Exp. 01           | 537                           |
|                 |                                  | Exp. 02           | 789                           |
|                 |                                  | Exp. 03           | 642                           |
|                 | <i>Wild-type</i> 6 m             | Exp. 01           | 687                           |
|                 |                                  | Exp. 02           | 623                           |
|                 |                                  | Exp. 03           | 691                           |
|                 |                                  | Exp. 04           | 795                           |
|                 |                                  | Exp. 05           | 662                           |
|                 | <i>TDP2 -/-</i> 2 m              | Exp. 01           | 799                           |
|                 |                                  | Exp. 02           | 1249                          |
|                 |                                  | Exp. 03           | 1147                          |
|                 | <i>TDP2 -/-</i> 6 m              | Exp. 01           | 2267                          |
|                 |                                  | Exp. 02           | 1909                          |
|                 |                                  | Exp. 03           | 1742                          |
|                 |                                  | Exp. 04           | 2594                          |
| Exp. 05         |                                  | 2463              |                               |

## SUPPLEMENTARY FIGURE LEGENDS

### FIGURE S1 (related to Figure 1)

#### Cell cycle analysis, generation of *TOP2β*<sup>-/-</sup> and *TOP2β*<sup>-/-</sup>/*shTOP2α* LNCaP cells.

(a) The cell cycle analysis. The cells were stained with FITC-conjugated anti-BrdU antibody to measure BrdU incorporation into genomic DNA and with propidium iodide (PI) to measure the total DNA. *Wild-type* LNCaP cells were analysed before (cyclin) and after 48-h of serum starvation. (b) Scatter dot plot representing the distribution of number of  $\gamma$ H2AX foci in *wild-type* LNCaP cell (related to Figure 1c). The lines on the data represent median values. A Single asterisk indicates  $p < 0.0001$ , which was calculated by an unpaired two-tailed *t*-test in the GraphPad Prism. (c) Scatter dot plot representing the distribution of number of  $\gamma$ H2AX foci in *wild-type* LNCaP cell (related to Figure 1e). The lines on the data represent median values. A Single asterisk indicates  $p < 0.0001$ , which was calculated by an unpaired two-tailed *t*-test. (d) Schematic diagram of *TOP2β*<sup>-/-</sup> genomic locus, target location, and gRNA sequence. “ATG” indicates the start codon of the TOP2 $\beta$  gene (top). Targeting events were confirmed by western blotting analysis (lower) of TOP2 $\beta$ . Blot shows *wild-type* and *TOP2β*<sup>-/-</sup> cells, generated for this study.  $\beta$ -Actin was a loading control. (e) Western blot analysis of Top2 $\alpha$  expression at 0 and 48 h after serum starvation in *wild-type* LNCaP cells.  $\beta$ -Actin was a loading control. (f) Western blot analysis of TOP2 $\alpha$ -shRNA-treated (*shTOP2 $\alpha$* ) LNCaP cells. Lanes 1, 2, and 3 show *wild-type*, *TOP2β*<sup>-/-</sup>, and control-shRNA-treated cells, respectively, representing positive controls. Lane 4 shows a successful depletion of TOP2 $\alpha$  by shRNA.  $\beta$ -Actin was a loading control. (g) Scatter dot plot representing the distribution of number of  $\gamma$ H2AX foci in the indicated genotypes of LNCaP cell (related to Figure 1g). The lines on the data represent median values. Single, double, and triple asterisks indicate  $p = 9.4 \times 10^{-1}$  (no significant difference),  $p < 0.0001$ , and  $p = 5.0 \times 10^{-1}$  (no significant difference), respectively, which were calculated by an unpaired two-tailed *t*-test.

### FIGURE S2 (related to Figure 2)

#### Generation of *TDP2*<sup>-/-</sup> LNCaP cells and quantification of R1881-induced $\gamma$ H2AX foci.

(a) Schematic diagram of *TDP2* genomic locus, target location, and gRNA sequence. Western blot analysis of TDP2. Western blot shows *wild-type* and *TDP2*<sup>-/-</sup> cells, generated for this study.  $\beta$ -Actin was a loading control. (b) Scatter dot plot representing the distribution of number of  $\gamma$ H2AX foci at 0, 4, 12, and 24 h in the indicated genotypes of LNCaP cell (related

to Figure 2c). The lines on the data represent median values. Both single, and double asterisks indicate  $p < 0.0001$ , which were calculated by an unpaired two-tailed  $t$ -test in the GraphPad Prism. (c) Western blot analysis of *TOP2 $\alpha$* -shRNA-treated (shTOP2 $\alpha$ ) LNCaP cells. Blot shows control-shRNA-treated cells, representing positive control and a successful depletion of TOP2 $\alpha$  by shRNA.  $\beta$ -Actin was a loading control.

## FIGURE S3

### Tissue-specific expression of androgen receptor and TDP2.

(a) Overview of Tissue-specific androgen receptor (AR) RNA expression in Human. Consensus Normalized eXpression (NX) levels for 55 tissue types and 6 blood cell types, created by combining the data from the three transcriptomics datasets (HPA, GTEx and FANTOM5) using the internal normalization pipeline ([proteinatlas.org/ENSG00000169083-AR/tissue](http://proteinatlas.org/ENSG00000169083-AR/tissue)). (b) AR expression in different tissues/cells in mouse (<http://biogps.org/#goto=genereport&id=11835>): 1. MEF, 2. Mammary\_gland\_lact, 3. Adipose\_white, 4. Lung, 5. Placenta, 6. Uterus, 7. Ovary, 8. Bladder, 9. Umbilical\_cord, 10. Epidermis, 11. Stomach, 12. Intestine\_large, 13. Intestine\_small, 14. Salivary\_gland, 15. Lacrimal\_gland, 16. Prostate, 17. Pancreas, 18. Pituitary, 19. Adrenal\_gland, 20. Skeletal\_muscle, 21. Mammary\_gland\_non-lactating, 22. Adipose\_brown, 23. Heart, 24. Embryonic\_stem\_line\_V26\_2\_pi6, 25. Embryonic\_stem\_line\_Brucc4\_pi3, 26. Stem\_cells\_HSC, 27. Common\_myeloid\_progenitor, 28. Granulo\_mono\_progenitor, 29. Mega\_erythrocyte\_progenitor, 30. Thymocyte\_DP\_CD4+CD8+, 31. Thymocyte\_SP\_CD4+, 32. Thymocyte\_SP\_CD8+, 33. T-cells\_CD4+, 34. T-cells\_CD8+, 35. T-cells\_foxP3+, 36. NK\_cells, 37. B-cells\_GL7\_negative\_Alum, 38. B-cells\_GL7\_positive\_KLH, 39. B-cells\_GL7\_positive\_Alum, 40. B-cells\_GL7\_negative\_KLH, 41. Follicular\_B-cells, 42. B-cells\_marginal\_zone, 43. Baf3, 44. Mast\_cells, 45. Mast\_cells\_IgE, 46. Mast\_cells\_IgE+antigen\_1hr, 47. Mast\_cells\_IgE+antigen\_6hr, 48. Dendritic\_cells\_myeloid\_CD8a-, 49. Dendritic\_cells\_lymphoid\_CD8a+, 50. Dendritic\_plasmacytoid\_B220+, 51. Macrophage\_bone\_marrow\_0hr, 52. Macrophage\_bone\_marrow\_2hr\_LPS, 53. Macrophage\_bone\_marrow\_6hr\_LPS, 54. Macrophage\_bone\_marrow\_24h\_LPS, 55. Macrophage\_peri\_LPS\_thio\_0hrs, 56. Macrophage\_peri\_LPS\_thio\_1hrs, 57. Macrophage\_peri\_LPS\_thio\_7hrs, 58. Granulocytes\_mac1+gr1+, 59. Osteoclasts, 60. Osteoblast\_day\_5, 61. Osteoblast\_day\_14, 62. Osteoblast\_day\_21, 63. Microglia, 64. Spleen, 65. Lymph\_nodes, 66. Bone\_marrow, 67. Bone, 68. Nih\_3T3, 69. C2C12, 70. C3H10T1\_2, 71. 3T3-L1, 72. MIMCD-3, 73. Neuro2a, 74. RAW\_264\_7, 75. Mln6, 76. Liver, 77. Kidney, 78. Retinal\_pigment\_epithelium, 79. Retina, 80. Iris, 81. Ciliary\_bodies,

82. Eyecup, 83. Lens, 84. Cornea, 85. Cerebral cortex prefrontal, 86. Cerebral cortex, 87. Amygdala, 88. Hippocampus, 89. Olfactory\_bulb, 90. Spinal cord, 91. Hypothalamus, 92. Cerebellum, 93. Nucleus\_accumbens, 94. Dorsal\_striatum, 95. Dorsal\_root\_ganglia, and 96. Testis. High-throughput gene expression profiling from a diverse array of normal tissues, organs, and cell lines in mice. (c) Overview of tissue-specific TDP2 RNA expression in Human. Consensus Normalized eXpression (NX) levels for 55 tissue types and 6 blood cell types, created by combining the data from the three transcriptomics datasets (HPA, GTEx and FANTOM5) using the internal normalization pipeline (<https://www.proteinatlas.org/ENSG00000111802-TDP2/tissue>). (d) TDP2 expression in different tissues/cells in mouse (<http://biogps.org/#goto=genereport&id=56196>) as in (b). High-throughput gene expression profiling from a diverse array of normal tissues, organs, and cell lines in mice.

#### **FIGURE S4 (related to Figure 3)**

##### **R1881-induced $\gamma$ H2AX foci in the prostate gland and spleen**

(a) Scatter dot plot representing the distribution of number of  $\gamma$ H2AX foci in the prostate at 0, 6, 12, and 20 h in the indicated genotypes of mice (related to Figure 3b). The lines on the data represent median values. Both single, and double asterisks indicate  $p < 0.0001$ , which were calculated by an unpaired two-tailed *t*-test. (b) Representative images of the R1881-induced  $\gamma$ H2AX foci in the spleen. Scale bar represents 25  $\mu$ m. (c) Scatter dot plot representing the distribution of number of  $\gamma$ H2AX foci in the spleen at 0 and 6 h in the indicated genotypes of mice. The lines on the data represent median values. (d) The average number of E2-induced  $\gamma$ H2AX foci in the epithelial cells of the mammary gland in the indicated genotypes. The data of *wild-type* #1, *53BP1*<sup>-/-</sup>, and *53BP1*<sup>-/-</sup>/*BRCA1*<sup>-/-</sup> mice were re-calculated from the data that has been previously published (Sasanuma et al., 2018).

#### **FIGURE S5 (related to Figure 4)**

##### **R1881-induced EdU<sup>+</sup> or PCNA<sup>+</sup> epithelial cells in the tissues.**

(a) Representative images of EdU labelled (green) Intestine and Spleen as positive control after 3-day continuous ip with EdU and/or R1881. Green labelling indicates EdU<sup>+</sup> cells which actively incorporate EdU during replication. (b) Representative images of PCNA<sup>+</sup> luminal epithelial cells in the prostate gland. The magenta and green labelling represent PCNA and

CK-8/18, respectively. CK-8/18 is the marker of prostate luminal epithelial cells. Scale bar represents 25  $\mu\text{m}$  and 75  $\mu\text{m}$  for Intestine and Spleen, respectively.
